# Modeling SARS-CoV-2 nsp1–5'-UTR complex via the extended ensemble simulations

Shun Sakuraba,<sup>\*,†</sup> Xie Qilin,<sup>‡</sup> Kota Kasahara,<sup>¶</sup> Junichi Iwakiri,<sup>§</sup> and Hidetoshi Kono<sup>†</sup>

<sup>†</sup>*Institute for Quantum Life Science, National Institutes for Quantum and Radiological Research and Technology, 8-1-7 Umemi-dai, Kizu, Kyoto 619-0215*

<sup>‡</sup>*College of Pharmaceutical Sciences, Ritsumeikan University, 1-1-1 Noji-higashi, Kusatsu, Shiga 525-8577*

<sup>¶</sup>*College of Life Sciences, Ritsumeikan University, 1-1-1 Noji-higashi, Kusatsu, Shiga 525-8577*

<sup>§</sup>*Graduate School of Frontier Sciences, The University of Tokyo, 5-1-5 Kashiwanoha, Kashiwa, Chiba 277-8561*

E-mail: sakuraba.shun[at]qst.go.jp

## Abstract

Nonstructural protein 1 (nsp1) of severe acute respiratory syndrome coronavirus 2 (SARS-CoV-2) is a 180-residue protein that blocks the translation of SARS-CoV-2 infected cells. Although it has been known that SARS-CoV-2's own RNA evades an nsp1's host translation shutoff, its molecular mechanism has been poorly understood. We performed an extended ensemble molecular dynamics simulation to investigate the mechanism of viral RNA evasion. Simulation results showed that the stem loop structure of SARS-CoV-2 RNA 5'-untranslated region is recognized by both nsp1's globular region and intrinsically disordered region. The recognition presumably enables

selectively translating the viral RNAs. A cluster analysis of the binding mode and a detailed analysis of the binding poses were performed, and we identified a few important residues involved in the SL1 recognition mechanism. The simulation results implied that nsp1 C-terminal helices are lifted from the 40S ribosome upon the binding of SL1 to the nsp1, reenabling the translation blocked by the C-terminal helices.

## Introduction

SARS-CoV-2 (severe acute respiratory syndrome coronavirus 2) belongs to *Betacoronaviridae*, and is a causative pathogen of the COVID-19. Nonstructural protein 1 (nsp1) of SARS-CoV-2 resides at the beginning of SARS-CoV-2's genome, and is the first protein translated upon the SARS-CoV-2 infection. After the self-cleavage of an open reading frame 1a (orf1a) by an orf1a-encoded protease (nsp3; PLpro), nsp1 is released as a 180-residue protein. Before the emergence of the SARS-CoV-2, nsp1 of SARS-CoV-1, the causative pathogen of the SARS, has been extensively studied. Nsp1 of SARS-CoV-1 is homologous to SARS-CoV-2 nsp1, and it shares a high (84 %) sequence identity to that of SARS-CoV-2. Nsp1 suppresses the host gene expression,<sup>1-6</sup> and induces the host messenger RNA (mRNA) cleavage.<sup>1,2,7,8</sup> Under the presence of nsp1, translation of mRNAs is effectively blocked. The translation shutoff hinders the host cell's innate immune response including interferon-dependent signaling.<sup>1,9</sup> Recently, multiple groups reported cryogenic electron microscopy (cryo-EM) structures of SARS-CoV-2 nsp1-40S ribosome complexes.<sup>10-12</sup> The structural analysis has shown that two  $\alpha$ -helices are formed at the C-terminal region (153-160, 166-179) of nsp1 and binds to the 40S ribosome. The helices block the host translation by shutting the tunnel in the ribosome for the messenger RNA (mRNA). The blockade leads to the inhibition of the 48S ribosome pre-initiation complex formation that is vital for the translation initiation.<sup>3,12</sup>

While nsp1 shuts the host mRNA translation, it has been known that the viral RNAs are translated even in the presence of the nsp1, and also that they evade the degradation.<sup>2-4</sup> These mechanisms force infected cells to produce only viral proteins instead of normal host

cell proteins; indeed, transcriptome analysis has shown that 65 % of total RNA reads from SARS-CoV-2 infected Vero cells were mapped to the viral genome.<sup>13</sup> It has been revealed that nsp1 recognizes the 5'-untranslated region (5'-UTR) of the viral RNA<sup>4,6,11</sup> and selectively enables the translation of RNAs that have a specific sequence. The first stem loop in 5'-UTR<sup>4,6,14</sup> has been identified as necessary in the translation initiation under the presence of nsp1; specifically, bases 1-36 of SARS-CoV,<sup>4</sup> 1-33 of SARS-CoV-2,<sup>14</sup> or 1-40 of SARS-CoV-2<sup>6</sup> attached to 5'-UTR of the protein re-enable the translation. However, their precise molecular mechanism has been poorly understood, and remained to be uncovered.

In the present research, we aimed to describe the detailed mechanism of the viral RNA evasion of nsp1. We modeled and simulated the complex of SARS-CoV-2 nsp1 and the SARS-CoV-2 5'-UTR's first stem loop using an extended ensemble molecular simulation. The detailed analysis of the simulation suggests the molecular basis of the 5'-UTR recognition by nsp1, in which interaction of nsp1 and the stem loop prevents nsp1's C-terminal helices from binding the ribosomal tunnel.

# Methods

**Simulation setup.** We constructed a complex of nsp1 and 5'-UTR of SARS-CoV-2 RNA. Nsp1 is a partially disordered 180-residue protein, in which the structures of residues 12-127 and 14-125 have been solved by X-ray crystallography in SARS-CoV and SARS-CoV-2, respectively. Structures of other residues (1-11, 128-180) are unknown, and residues 130-180 have been considered intrinsically disordered region (IDR).<sup>15,16</sup> We constructed SARS-CoV-2 nsp1 structure using the homology modeling based on SARS-CoV nsp1 conformation (Protein Data Bank (PDB) ID: 2HSX<sup>15</sup>). Modeling was performed by MODELLER.<sup>17</sup> We note that SARS-CoV nsp1 and SARS-CoV-2 nsp1 are aligned without gaps. The structure of IDR was constructed so as to form an extended structure. For nsp1, we used AMBERff14SB force field<sup>18-21</sup> in the subsequent simulations.

The initial structure of the RNA stem was constructed using RNAcomposer.<sup>22,23</sup> Bases numbered as 1-35 from the SARS-CoV-2 reference genome (NCBI reference sequence ID NC\_045512.2)<sup>24</sup> were used in the present research. This sequence corresponds to the first stem loop of SARS-CoV-2 RNA 5'-UTR. Hereafter, we call this RNA *SL1*. SL1 was capped by 7-methyl guanosine triphosphate (m7G-ppp-). First base (A1) after the cap was methylated at 2'-O position to reflect viral capped RNA. Charges and bonded force field parameters for these modified bases were prepared by the restrained electrostatic potential (RESP) method<sup>25</sup> and by the analogy to existing parameters, respectively. For SL1, we used the combination of AMBER99 + bsc0 +  $\chi$ OL3.<sup>18,19,26,27</sup> To maintain the structure of the stem loop to be stable, we employed the distance restraints between G-C bases. Specifically, between residues G7-C33, G8-C32, C15-G24, and C16-G23, distance restraints were applied such that the distances between N1, O6, and N2 atoms of guanosine and N3, N4, and O2 atoms of cytidine, respectively, do not exceed 4.0 Å. Between these atoms, flat-bottom potentials were applied, where each potential is zero when the distance between two atoms is less than 4.0 Å, and a harmonic restraint is applied when it exceeds 4.0 Å with a spring constant of 1 kJmol<sup>-1</sup>Å<sup>-2</sup>. We used **acpype**<sup>28</sup> to convert AMBER force field files generated by AmberTools<sup>29</sup> into GROMACS.

Nsp1 and SL1 models were then merged and solvated in the 150 mM KCl solution. TIP3P<sup>30</sup> water model and Joung-Cheatham monovalent ion parameters<sup>31</sup> were used (73,468 water molecules, 253 K ions, 209 Cl ions). The initial structure is presented in Fig. 1A. A periodic boundary condition of the rhombic dodecahedron shape was used with the size of *ca.* 140 Å along the X-axis. Note that we started the simulation from the unbound state, i.e., nsp1 and SL1 did not directly contact with each other. The total number of atoms in the system was 224,798.

Although it is possible to perform a molecular dynamics simulation of an nsp1-SL1 complex, due to excessive charges in both molecules, with conventional simulations the model tends to be trapped around the initial configuration of the complex. Previously, it has been

shown that the sampling for nucleic acids–protein systems can be effectively solved by extended ensemble simulations.<sup>32–34</sup> In this work, we used the replica exchange with solute tempering (REST) version 2 to sample various configurations of SL1 and IDR of nsp1.<sup>35</sup> We set both the disordered region (nsp1 1-11 and 128-180) and the whole SL1 as the “hot” region of the REST2 simulation. Note that, in addition to the charge scaling for nsp1 and SL1, we also scaled the charges of counter-ions to prevent unneutralized system charge in the Ewald summation. The total number of replicas used in the simulation was 192. The replica numbered 0 corresponds to the simulation with the unscaled potential. In the final replica (numbered 191), nonbonded potentials between “hot”-“hot” groups were scaled by 0.25. Exchange ratios were 53-78 % across all replica. To prevent numerical errors originating from the loss of significant digits, we used a double-precision version of GROMACS as a simulation software.<sup>36</sup> We also modified GROMACS to enable the replica exchange simulation with arbitrary Hamiltonian.<sup>37</sup> The patch representing modifications is supplied in the supporting information.

The simulation was performed for 50 ns (thus,  $50 \text{ ns} \times 192 = 9.6 \mu\text{s}$  in total), and the first 25 ns were discarded as an equilibration time. The simulation was performed with NVT and the temperature was set to 300 K. The temperature was controlled by the velocity rescaling method.<sup>38</sup> The timestep was set to 2 fs, and hydrogens attached to heavy atoms were constrained with LINCS.<sup>39</sup>

**Simulation analysis.** To obtain the proper structure ensemble under the unmodified potential function, we used the multistate Bennett acceptance ratio (MBAR) method.<sup>40,41</sup> With the MBAR method, we can obtain a weighted ensemble corresponding to the canonical ensemble, i.e., trajectory with a weight assigned on each frame, from multiple simulations performed with different potentials. Only eight replicas corresponding to the eight lowest replica indices (i.e., the one with the unscaled potential function and seven replicas with the closest to the unscaled potential) were used in the MBAR analysis. The weighted ensemble

of the trajectory was used in the subsequent analyses. The ensemble of the structures with the weight information is available online at <https://bsma.pdbj.org/entry/26>. Visualization was performed with VMD<sup>42</sup> and pymol.<sup>43</sup> The secondary structure of nsp1 including the IDR was analyzed using the secondary structure definition of DSSP<sup>44</sup> using `mdtraj`.<sup>45</sup> We tested the convergence of the ensemble using the secondary structure distribution and the stability of the hydrogen bonds between nsp1 and SL1 (see the supplementary material for details).

**Interactions between nsp1-SL1.** We applied three criteria to detect interactions between nsp1 and SL1. (i) Inter-residue contacts were detected with the criterion that inter-atomic distance between  $C\alpha$  of an amino acid residue and  $C4'$  of a nucleotide residue is less than or equal to 12 Å. (ii) Hydrogen bonds were detected with the criteria that the hydrogen-acceptor distance is less than 2.5 Å and donor-hydrogen-acceptor angle is greater than 120 degrees. (iii) Salt-bridges were detected with the criterion that the distance between a phosphorous atom of RNA backbone and a distal nitrogen atom of Arg or Lys is less than 4.0 Å.

**Clustering.** On the basis of the inter-residue contact information, the binding modes of the nsp1-SL1 complex observed in the ensemble were evaluated by applying the clustering method. The inter-residue contact information of each snapshot was represented as a contact map consisting of a  $180 \times 36$  binary matrix. The distance between two snapshots was then calculated as the Euclidian distance of vectors with  $180 \times 36 = 6480$  elements. We applied the DBSCAN method<sup>46</sup> to classify the binding modes. We arbitrarily determined two parameters for the DBSCAN method, `eps` and `minPts`, to obtain a reasonable amount of clusters each of which has distinct binding modes. Note that the DBSCAN generates the clusters each of which has more than `minPts` members based on the similarity threshold `eps`. The clusters with members less than `minPts` (including singletons) are treated as outliers. We used `eps = 6` and `minPts = 200` in this research. We also tested another clustering algorithm,

OPTICS,<sup>47</sup> and confirmed that two different methods generate qualitatively similar results (data not shown).

## Results and discussion

**IDR partially forms the secondary structure and binds to SL1.** Although we did not restrain the RNA-nsp1 distance in the simulation and started the simulation with two molecules apart, they formed a complex in the canonical ensemble. Figure 1 (B) shows the representative snapshot of the complex at the end of the simulation. The RNA stem binds to the C-terminal disordered region. However, as represented in Fig. 1 (C), when the N-terminal domain of nsp1 was superimposed, RNA structures did not have a specific conformation. The result implied that there was no distinct, rigid binding structure between nsp1 and the RNA.

Next, we investigated the secondary structure of the nsp1 region. Even though we started the simulation from an extended configuration, the C-terminal region at residues 153-179 partially formed two  $\alpha$ -helices. The result corroborates with the fact that the C-terminal region forms two helices (153-160, 166-179) and shuts the translation by capping the pore that mRNA goes through in the Cryo-EM structural analysis. The result also indicates that the cap structure is formed before nsp1 binds to the ribosome by the pre-existing equilibrium, although the ratio of the helix-forming structures is only up to 50 %. In addition to these known helices, residues 140-150 also weakly formed a mixture of  $\alpha$ -helix and 3-10 helix. Residues at other regions (1-11, 128-139) remained to be disordered.

**Distance between nsp1 N-terminal domain and C-terminal helices.** Recent cryo-EM structures, although ambiguously, suggest that the N-terminal domain of nsp1 reside on the 40S ribosome (Fig. 3). Inspired by the structures, we investigated the geometrical restraints of nsp1 in the presence of the SL1. The distance between the center-of-mass of nsp1 N-terminal domain (defined by residues 14-125) and that of C-terminal helices (153-179) was

calculated and its histogram was plotted in Fig. 3(C). The distance distribution had two peaks at 27 and 33 Å, which was below 49.8 Å estimated from the cryo-EM structure (see supporting information for details). Indeed, 90.7 % of the trajectory had a distance less than the experimentally estimated distance of 49.8 Å. The result indicates that the configuration observed in the cryo-EM structure, which does not include SL1, is unlikely to happen when nsp1 is complexed with the SL1.

**SL1's hairpin is recognized by nsp1 IDR.** Inter-residue contact probabilities between nsp1 and SL1 in the canonical ensemble are summarized in Table 1 and Fig. 4. Based on the distribution of the interactions, we categorized the binding interface on nsp1 into the five regions (Fig. 1D and Supplementary Table S1): (i) the N-terminus (the 1–18th residues), (ii) the  $\alpha 1$  helix (the 31–50th residues), (iii) the disordered loop between  $\beta 3$  and  $\beta 4$  (the 74–90th residues), (iv) the N-terminal side of the IDR (the 121–146th residues), and (v) the C-terminal side of the IDR (the 147–180th residues). These regions primarily interacted with some bases around C20 of the RNA fragments which compose the stem loop. The most major region to recognize SL1 was the region (iv), the N-terminal side of the IDR. The probability for contacts between any residue of this region and SL1 was 97.4 %. In particular, the contact between Asn126 and U18 was observed in 84.1 % of the canonical ensemble. The most frequently observed hydrogen bond in the canonical ensemble was Arg124–U18, the probability of which was 26.0 % (Table 1). The second major interface region was in the region (ii),  $\alpha 1$  helix, which has two basic residues (Arg43 and Lys47), and they frequently formed salt-bridges with the backbone of SL1. 69.8 % of the canonical ensemble included at least one salt-bridge in this region. The third one was the region (iii) consisting of the loop between  $\beta 3$  and  $\beta 4$ ; 63.2 % of the canonical ensemble included at least one contact at this region. Asp75 sometimes formed hydrogen bonds with the base of SL1. The regions (i) and (v) did not have a strong tendency to form hydrogen bonds nor salt-bridges but frequently contacted in some residues in these regions; the probability for interactions with the regions



(i) and (v) were 72.1 % and 59.2 %, respectively.

As an overall shape, the nsp1 surface consists of positive and negative electrostatic surface patches separated by a neutral region as shown in Fig. 6A.<sup>48</sup> The  $\alpha 1$  helix in the region (i) forms the interface of these two patches; one side of the helix has basic residues (Arg43 and Lys47), and the other side consists of some hydrophobic residues (Val38, Leu39, Ala42, and Leu46). The positive side of the  $\alpha 1$  helix forms a shape like a hill with a positively charged cliff (Fig. 6(B)). The bottom of the valley constituted by the N-terminus and  $\beta 3$ - $\beta 4$  loop, or the regions (i) and (iii), respectively, also have positive electrostatic potentials. These positively charged cliff and valley attract and fit to the negatively charged backbone of SL1. Eventually the IDRs in region (iv) and (v) grab SL1.

Although the binding site on nsp1 for SL1 can be characterized as the interface consisting of the regions (i) through (v), SL1 did not take a stable conformation even when it bounds to these regions. Diverse binding modes were observed in the canonical ensemble. Although the SL1 almost always interacted with some residues of the region (iv), its conformation fluctuated highly and was diverse. In addition, the IDR of nsp1 was also highly flexible.

**Clustering analysis of binding poses.** The diversity of binding modes were further investigated with the cluster analysis based on the contact map for each snapshot (see the Methods section). We determined the clustering threshold to hold the condition that any cluster has at least one inter-residue contacts with more than 80 % in each cluster. As a result, the binding modes can be categorized into 14 clusters and outliers, which has 34.2 % of statistical weight in the canonical ensemble. Even in the most major cluster, its statistical weight was 15.5 %; that for the second, third, and fourth clusters were 9.9 %, 7.4 %, and 5.0 %, respectively. Each cluster had a unique tendency to use a set of binding regions (Supplementary Table S2, Supplementary Figure S3). We also analyzed the differences in surface areas of interacting interfaces in ordered and disordered regions of nsp1 among the 14 clusters (Supplementary Figure S4). The distribution shows the unique characteristics

of each cluster. These results indicate that recognition of SL1 by nsp1 is established by multimodal binding modes.

The representative structure of cluster 1, which had the largest population among all clusters, is presented in Fig. 7 and Supplementary Table S3. Nsp1 recognized SL1 via the regions (ii), (iii), and (iv). At the region (ii), the basic residues in H2 formed salt-bridge Arg43–C17 and Lys47–U16. The region (iii) recognized to SL1 via the hydrogen bond Asp75–U18. The residues Arg124 through Gly137 in the region (iv) attached to SL1 with some hydrogen bonds, Arg124–U17, Ala131–C19, and Ser135–C16; Tyr136 stacks between C21 and G23 instead of A22, which was flipped out. Representative structures of clusters 2 and 3 are also presented in the supporting material (Supplementary Figures S5 and S6 and Supplementary Tables S4 and S5).

**Model of the mechanism.** Based on the simulation results, we suggest a model of the mechanism in Fig. 8. Without the SL1, both N-terminal domain and C-terminal helices bind to the 40S ribosome, blocking human mRNAs. With the SL1, due to the binding between SL1 and nsp1 at both the N-terminal domain and a part of IDR, C-terminal helices are pulled, and they cannot maintain the binding with the 40S ribosome. The 5'-end of the viral RNA will then be loaded into the ribosome, and the translation begins.

**Relation to other experimental results.** It has been reported that Arg124Ala–Lys125Ala double mutant loses the capability to recognize viral RNA,<sup>3</sup> which can be explained by our simulation results. The simulation showed that Arg124 sidechain strongly interacts with the phosphate backbone of 18U (Table 1 and Figs. 5 and 7). Arg124Ala mutation is thus considered to incite the loss of the ionic interaction between the sidechain and the backbone, and the nsp1 loses the recognition capability.

The circular dichroism (CD) spectrum of SARS-CoV-2 nsp1 C-terminal region of 130-180<sup>16</sup> in solution had only a single peak at 198 nm and did not show ellipticities at 208 nm and 222 nm, which indicated that the nsp1 C-terminal region did not form  $\alpha$ -helices

nor  $\beta$ -sheets and was disordered. Although in our simulation we found nsp1 partially forms  $\alpha$ -helix in the IDR, our simulation also indicated that the percentage of the helix is low and not stable, which may explain the difference to the experimental facts. The difference may also be attributed to the existence of RNA and other solvent conditions, and the force field inaccuracies, but further study is required to conclude.

Whether SARS-CoV-2 nsp1 and SL1 bind without the ribosome is controversial. It has been reported that nsp1 and 7-33 bases of SARS-CoV-2 was reported to bind with a binding constant of 0.18  $\mu$ M,<sup>49</sup> but it also has been reported that the gel shift did not occur with 5'-UTR of SARS-CoV-2 up to 20  $\mu$ M when transfer RNA was used to exclude the non-specific binding.<sup>6</sup> Current simulation results indicated that the binding mode observed herein did not have a specific, defined structure. Typically, with such binding modes, the binding is expected to be weak; we thus consider the current simulation results do not contradict to neither experiments.

It has been reported that mutations to SL1 bases 14-25, which disrupt the Watson-Crick pairs of the stem loop, cause the translation to be shut off.<sup>6</sup> The result corroborates with our results that the hairpin structure of bases 18-22 in SL1 is recognized by nsp1. The hydrogen-bond interaction analysis showed that the RNA phosphate backbone is mainly recognized within C15-C20 region (Table 1 and Fig. 5). Furthermore, our finding corroborates with the fact that the sequence of hairpin (corresponding to U18-C21 in our simulation) region is not well conserved among SARS-CoV-2 mutational variants while that of the stem is well conserved.<sup>50</sup> Our simulation shows that the interaction between nsp1 and SL1 backbone is stronger than that of nsp1 and SL1 sidechains (Table 1), underlining the importance of the backbone interaction.

**Limitations of this study.** Our simulation was performed based on several assumptions. Here, we list the limitations of the current study.

First of all, our simulation was performed without the ribosome. This was mainly because

the simulation started before the nsp1-ribosome complex structure was deposited. Furthermore, at the time of submitting this manuscript, the orientation of the nsp1 N-terminal domain attached to the 40S ribosome is still ambiguous in density maps. With the 40S ribosome, the environment around nsp1 may be altered, hence the interaction between the RNA and nsp1. Specifically, ribosome mostly consists of ribosomal RNAs and are thus strongly negatively charged, which may change the interaction environment significantly.

We performed the simulation with restraints to G-C pairs in 5'-UTR to maintain the stability of the hairpin loop structure. The restraints may have hindered RNA forming other structures than the initial hairpin structure. However, in the secondary structure prediction using CentroidFold,<sup>51</sup> these base pairs were predicted to exist in more than 92 % of the ensemble. Furthermore, a recent study<sup>52</sup> showed that, even with a rigorous extended ensemble simulation, the hairpin structure remained intact. From these results, the drawback of structural restraints to SL1 is expected to be minimal.

Finally, as is always the case with the simulation study, the mismatch between the simulation force field and the real world leaves a non-negligible gap. In addition to that, some residues may have alternative protonation states upon binding to RNA (e.g., histidine protonation state).

**Future research and conclusions.** Current simulation research was performed with nsp1 and SL1 only. Arguably, a simulation of the complex consisting of the 40S ribosome, nsp1 and SL1 will be an important step to understand the detailed mechanism of the viral RNA evasion of nsp1. Current simulation results showed that nsp1-SL1 binding has multimodal binding structures. The addition of the 40S ribosome to the system may confine the possible binding poses to fewer in number, and possibly more tight binding poses may be obtained.

In addition to a simulation study, mutational analysis on nsp1 will be beneficial. In addition to already known mutation at Arg124, current simulation results predict that the following residues are important in the nsp1-SL1 binding: Lys47, Arg43, and Asn126. Mu-

tant analysis of these residues will help us to understand the molecular mechanism of nsp1.

Finally, the development of inhibitors for nsp1–stem loop binding, is highly anticipated in the current epidemic. Although our current result implied that the specific binding structure might not exist, important residues in nsp1, as well as bases in SL1, were detected. Blocking these residues/bases, or mimicking the binding of these residues/bases, may effectively nullify the function of nsp1.

In conclusion, using the molecular dynamics simulation, we investigated the binding and molecular mechanism of SARS-CoV-2 nsp1 and the 5'-UTR stem loop of SARS-CoV-2. The result suggests that the interaction between nsp1 and the 5'-UTR stem loop prevents the C-terminal helices bind to the ribosome, and thus the translation shutoff is avoided. The interaction analysis further revealed that the hairpin loop structure of 5'-UTR stem loop is recognized both by the N-terminal domain and also by the intrinsically disordered region of nsp1. Multiple binding poses were obtained, and the largest cluster of binding poses included interactions that coincides with the result of the previous mutational analysis.

## Acknowledgement

We thank Dr. Atsushi Matsumoto for the technical assistance. This research was supported by the Basis for Supporting Innovative Drug Discovery and Life Science (BINDS) project under Grant Number JP20am0101106j0004, Agency for Medical Research and Development (AMED), Japan to HK, by the Grant-in-Aid for Early-Career Scientists by Japan Society for the Promotion of Science (JSPS), Japan to SS (JP16K17778), by the Grant-in-Aid for Scientific Research (A) by JSPS to SS (JP16H02484), (C) to KK (JP20K12069), and (C) to JI (JP20K12041), and by the Grant-in-Aid for Scientific Research on Innovative Areas by the Ministry of Education, Culture, Sports, Science and Technology (MEXT) to SS (JP19H05410). Simulations were performed on supercomputers at Research Center for Computational Science, Okazaki, and Academic Center for Computing and Media Studies,

Kyoto University. Authors declare no competing interests.

# Supporting Information Available

The supporting information is available free of charge:

- Assessment of the convergence, detailed procedure of the center-of-mass distance from Cryo-EM density map, and detailed description of clusters. (SI.pdf)
- Parameter files for RNA-cap force field (m7G-ppp-(2'-O-Me-A)). (forcefield.zip)
- Modifications added to the software as a series of patch files. (patch.zip)

# References

- (1) Narayanan, K.; Huang, C.; Lokugamage, K.; Kamitani, W.; Ikegami, T.; Tseng, C.-T. K.; Makino, S. Severe Acute Respiratory Syndrome Coronavirus nsp1 Suppresses Host Gene Expression, Including That of Type I Interferon, in Infected Cells. *Journal of Virology* **2008**, *82*, 4471–4479.
- (2) Kamitani, W.; Huang, C.; Narayanan, K.; Lokugamage, K. G.; Makino, S. A two-pronged strategy to suppress host protein synthesis by SARS coronavirus Nsp1 protein. *Nature Structural & Molecular Biology* **2009**, *16*, 1134–1140.
- (3) Lokugamage, K. G.; Narayanan, K.; Huang, C.; Makino, S. Severe Acute Respiratory Syndrome Coronavirus Protein nsp1 Is a Novel Eukaryotic Translation Inhibitor That Represses Multiple Steps of Translation Initiation. *Journal of Virology* **2012**, *86*, 13598–13608.
- (4) Tanaka, T.; Kamitani, W.; DeDiego, M. L.; Enjuanes, L.; Matsuura, Y. Severe Acute Respiratory Syndrome Coronavirus nsp1 Facilitates Efficient Propagation in Cells

- p>through a Specific Translational Shutoff of Host mRNA.
- Journal of Virology*
- 2012**
- ,
- 86*
- , 11128–11137.
- (5) Narayanan, K.; Ramirez, S. I.; Lokugamage, K. G.; Makino, S. Coronavirus nonstructural protein 1: Common and distinct functions in the regulation of host and viral gene expression. *Virus Research* **2015**, *202*, 89–100.
- (6) Tidu, A.; Janvier, A.; Schaeffer, L.; Sosnowski, P.; Kuhn, L.; Hammann, P.; Westhof, E.; Eriani, G.; Martin, F. The viral protein NSP1 acts as a ribosome gatekeeper for shutting down host translation and fostering SARS-CoV-2 translation. *RNA* **2020**, in press.
- (7) Kamitani, W.; Narayanan, K.; Huang, C.; Lokugamage, K.; Ikegami, T.; Ito, N.; Kubo, H.; Makino, S. Severe acute respiratory syndrome coronavirus nsp1 protein suppresses host gene expression by promoting host mRNA degradation. *Proceedings of the National Academy of Sciences* **2006**, *103*, 12885–12890.
- (8) Huang, C.; Lokugamage, K. G.; Rozovics, J. M.; Narayanan, K.; Semler, B. L.; Makino, S. SARS Coronavirus nsp1 Protein Induces Template-Dependent Endonucleolytic Cleavage of mRNAs: Viral mRNAs Are Resistant to nsp1-Induced RNA Cleavage. *PLoS Pathogens* **2011**, *7*, e1002433.
- (9) Wathelet, M. G.; Orr, M.; Frieman, M. B.; Baric, R. S. Severe Acute Respiratory Syndrome Coronavirus Evades Antiviral Signaling: Role of nsp1 and Rational Design of an Attenuated Strain. *Journal of Virology* **2007**, *81*, 11620–11633.
- (10) Thoms, M. et al. Structural basis for translational shutdown and immune evasion by the Nsp1 protein of SARS-CoV-2. *Science* **2020**, *369*, 1249–1255.
- (11) Schubert, K.; Karousis, E. D.; Jomaa, A.; Scaiola, A.; Echeverria, B.; Gurzeler, L.-A.; Leibundgut, M.; Thiel, V.; Mühlemann, O.; Ban, N. SARS-CoV-2 Nsp1 binds the ribosomal mRNA channel to inhibit translation. *Nature Structural & Molecular Biology* **2020**, *27*, 959–966.

- (12) Yuan, S.; Peng, L.; Park, J. J.; Hu, Y.; Devarkar, S. C.; Dong, M. B.; Shen, Q.; Wu, S.; Chen, S.; Lomakin, I. B.; Xiong, Y. Nonstructural Protein 1 of SARS-CoV-2 Is a Potent Pathogenicity Factor Redirecting Host Protein Synthesis Machinery toward Viral RNA. *Molecular Cell* **2020**, *80*, 1055–1066.e6.
- (13) Kim, D.; Lee, J.-Y.; Yang, J.-S.; Kim, J. W.; Kim, V. N.; Chang, H. The Architecture of SARS-CoV-2 Transcriptome. *Cell* **2020**, *181*, 914–921.e10.
- (14) Banerjee, A. K. et al. SARS-CoV-2 Disrupts Splicing, Translation, and Protein Trafficking to Suppress Host Defenses. *Cell* **2020**, *183*, 1325–1339.e21.
- (15) Almeida, M. S.; Johnson, M. A.; Herrmann, T.; Geralt, M.; Wüthrich, K. Novel  $\beta$ -Barrel Fold in the Nuclear Magnetic Resonance Structure of the Replicase Nonstructural Protein 1 from the Severe Acute Respiratory Syndrome Coronavirus. *Journal of Virology* **2007**, *81*, 3151–3161.
- (16) Kumar, A.; Kumar, A.; Kumar, P.; Garg, N.; Giri, R. SARS-CoV-2 NSP1 C-terminal region (residues 130-180) is an intrinsically disordered region. *bioRxiv* **2020**,
- (17) Fiser, A.; Šali, A. *Methods in Enzymology*; Elsevier, 2003; pp 461–491.
- (18) Cornell, W. D.; Cieplak, P.; Bayly, C. I.; Gould, I. R.; Merz, K. M.; Ferguson, D. M.; Spellmeyer, D. C.; Fox, T.; Caldwell, J. W.; Kollman, P. A. A second generation force field for the simulation of proteins, nucleic acids, and organic molecules. *Journal of the American Chemical Society* **1995**, *117*, 5179–5197.
- (19) Wang, J.; Cieplak, P.; Kollman, P. A. How well does a restrained electrostatic potential (RESP) model perform in calculating conformational energies of organic and biological molecules? *Journal of Computational Chemistry* **2000**, *21*, 1049–1074.
- (20) Hornak, V.; Abel, R.; Okur, A.; Strockbine, B.; Roitberg, A.; Simmerling, C. Com-



- p>
- parison of multiple Amber force fields and development of improved protein backbone parameters. *Proteins: Structure, Function, and Bioinformatics* **2006**, *65*, 712–725.
- (21) Maier, J. A.; Martinez, C.; Kasavajhala, K.; Wickstrom, L.; Hauser, K. E.; Simmerling, C. ff14SB: Improving the Accuracy of Protein Side Chain and Backbone Parameters from ff99SB. *Journal of Chemical Theory and Computation* **2015**, *11*, 3696–3713.
- (22) Popena, M.; Szachniuk, M.; Antczak, M.; Purzycka, K. J.; Lukasiak, P.; Bartol, N.; Blazewicz, J.; Adamiak, R. W. Automated 3D structure composition for large RNAs. *Nucleic Acids Research* **2012**, *40*, e112–e112.
- (23) Antczak, M.; Popena, M.; Zok, T.; Sarzynska, J.; Ratajczak, T.; Tomczyk, K.; Adamiak, R. W.; Szachniuk, M. New functionality of RNAComposer: application to shape the axis of miR160 precursor structure. *Acta Biochimica Polonica* **2017**, *63*.
- (24) Wu, F. et al. A new coronavirus associated with human respiratory disease in China. *Nature* **2020**, *579*, 265–269.
- (25) Bayly, C. I.; Cieplak, P.; Cornell, W.; Kollman, P. A. A well-behaved electrostatic potential based method using charge restraints for deriving atomic charges: the RESP model. *J. Phys. Chem.* **1993**, *97*, 10269–10280.
- (26) Perez, A.; Marchan, I.; Svozil, D.; Sponer, J.; Cheatham, T. E.; Laughton, C. A.; Orozco, M. Refinement of the AMBER force field for nucleic acids: improving the description of alpha/gamma conformers. *Biophys. J.* **2007**, *92*, 3817–3829.
- (27) Zgarbová, M.; Otyepka, M.; Šponer, J.; Mladek, A.; Banas, P.; Cheatham, T. E.; Jurecka, P. Refinement of the Cornell et al. Nucleic Acids Force Field Based on Reference Quantum Chemical Calculations of Glycosidic Torsion Profiles. *J. Chem. Theory Comput.* **2011**, *7*, 2886–2902.

- (28) da Silva, A. W. S.; Vranken, W. F. ACPYPE - AnteChamber PYthon Parser interfacE. *BMC Research Notes* **2012**, *5*, 367.
- (29) Case, D. et al. AMBER 2017. University of California, San Francisco, 2017.
- (30) Jorgensen, W. L.; Chandrasekhar, J.; Madura, J. D.; Impey, R. W.; Klein, M. L. Comparison of simple potential functions for simulating liquid water. *The Journal of Chemical Physics* **1983**, *79*, 926–935.
- (31) Joung, I. S.; Cheatham, T. E. Determination of alkali and halide monovalent ion parameters for use in explicitly solvated biomolecular simulations. *J. Phys. Chem. B* **2008**, *112*, 9020–9041.
- (32) Ikebe, J.; Sakuraba, S.; Kono, H. H3 histone tail conformation within the nucleosome and the impact of K14 acetylation studied using enhanced sampling simulation. *PLoS computational biology* **2016**, *12*, e1004788.
- (33) Li, Z.; Kono, H. Investigating the Influence of Arginine Dimethylation on Nucleosome Dynamics Using All-Atom Simulations and Kinetic Analysis. *The Journal of Physical Chemistry B* **2018**, *122*, 9625–9634.
- (34) Kasahara, K.; Shiina, M.; Higo, J.; Ogata, K.; Nakamura, H. Phosphorylation of an intrinsically disordered region of Ets1 shifts a multi-modal interaction ensemble to an auto-inhibitory state. *Nucleic acids research* **2018**, *46*, 2243–2251.
- (35) Wang, L.; Friesner, R. A.; Berne, B. J. Replica Exchange with Solute Scaling: A More Efficient Version of Replica Exchange with Solute Tempering (REST2). *The Journal of Physical Chemistry B* **2011**, *115*, 9431–9438.
- (36) Abraham, M. J.; Murtola, T.; Schulz, R.; Páll, S.; Smith, J. C.; Hess, B.; Lindahl, E. GROMACS: High performance molecular simulations through multi-level parallelism from laptops to supercomputers. *SoftwareX* **2015**, *1*, 19–25.

- (37) Bussi, G. Hamiltonian replica exchange in GROMACS: a flexible implementation. *Molecular Physics* **2013**, *112*, 379–384.
- (38) Bussi, G.; Donadio, D.; Parrinello, M. Canonical sampling through velocity rescaling. *The Journal of Chemical Physics* **2007**, *126*, 014101.
- (39) Hess, B.; Bekker, H.; Berendsen, H. J. C.; Fraaije, J. G. E. M. LINCS: A linear constraint solver for molecular simulations. *Journal of Computational Chemistry* **1997**, *18*, 1463–1472.
- (40) Souaille, M.; Roux, B. Extension to the weighted histogram analysis method: combining umbrella sampling with free energy calculations. *Computer Physics Communications* **2001**, *135*, 40–57.
- (41) Shirts, M. R.; Chodera, J. D. Statistically optimal analysis of samples from multiple equilibrium states. *J. Chem. Phys.* **2008**, *129*, 124105.
- (42) Humphrey, W.; Dalke, A.; Schulten, K. VMD – Visual Molecular Dynamics. *Journal of Molecular Graphics* **1996**, *14*, 33–38.
- (43) Schrödinger, LLC,
- (44) Kabsch, W.; Sander, C. Dictionary of protein secondary structure: Pattern recognition of hydrogen-bonded and geometrical features. *Biopolymers* **1983**, *22*, 2577–2637.
- (45) McGibbon, R. T.; Beauchamp, K. A.; Harrigan, M. P.; Klein, C.; Swails, J. M.; Hernández, C. X.; Schwantes, C. R.; Wang, L.-P.; Lane, T. J.; Pande, V. S. MD-Traj: A Modern Open Library for the Analysis of Molecular Dynamics Trajectories. *Biophysical Journal* **2015**, *109*, 1528–1532.
- (46) Ester, M.; Kriegel, H.-P.; Sander, J.; Xu, X., et al. A density-based algorithm for discovering clusters in large spatial databases with noise. KDD. 1996; pp 226–231.

- (47) Ankerst, M.; Breunig, M. M.; Kriegel, H.-P.; Sander, J. OPTICS. *ACM SIGMOD Record* **1999**, *28*, 49–60.
- (48) Semper, C.; Watanabe, N.; Savchenko, A. Structural characterization of nonstructural protein 1 from SARS-CoV-2. *iScience* **2021**, *24*, 101903.
- (49) Vankadari, N.; Jeyasankar, N. N.; Lopes, W. J. Structure of the SARS-CoV-2 Nsp1/5'-Untranslated Region Complex and Implications for Potential Therapeutic Targets, a Vaccine, and Virulence. *The Journal of Physical Chemistry Letters* **2020**, *11*, 9659–9668.
- (50) Miao, Z.; Tidu, A.; Eriani, G.; Martin, F. Secondary structure of the SARS-CoV-2 5'-UTR. *RNA Biology* **2020**, 1–10.
- (51) Sato, K.; Hamada, M.; Asai, K.; Mituyama, T. CENTROIDFOLD: a web server for RNA secondary structure prediction. *Nucleic Acids Research* **2009**, *37*, W277–W280.
- (52) Bottaro, S.; Bussi, G.; Lindorff-Larsen, K. Conformational Ensembles of Non-Coding Elements in the SARS-CoV-2 Genome from Molecular Dynamics Simulations. *bioRxiv* **2020**,

# List of Figures

|   |                                                                                                                                                                                                                                                                                                                                                                                                                                                                                                                                                                                        |    |
|---|----------------------------------------------------------------------------------------------------------------------------------------------------------------------------------------------------------------------------------------------------------------------------------------------------------------------------------------------------------------------------------------------------------------------------------------------------------------------------------------------------------------------------------------------------------------------------------------|----|
| 1 | (A) Initial structure before starting the simulation. (B) Structure of the complex at 50 ns in 0th replica (i.e., the simulation with the unscaled potential). (C) Structures from superimposed 20 representative snapshots of the nsp1-SL1 complex. Snapshots were obtained from a weighted random sampling. Different snapshots from SL1 were colored differently. (D) Nsp1 segmentation used in the analysis: (i) residues 1 to 18, green; (ii) residues 31 to 50, cyan; (iii) residues 74 to 90, magenta; (iv) residues 121 to 146, orange; (v) residues 147 to 180, blue. . . . . | 22 |
| 2 | Secondary structure distribution of nsp1. Probabilities were calculated using the reweighting of last 25 ns simulation trajectories. . . . .                                                                                                                                                                                                                                                                                                                                                                                                                                           | 23 |
| 3 | (A) The cryo-EM structure of nsp1-40S ribosome complex (Electron Microscopy Data Bank ID: EMD-11276). (B) The cartoon representation of nsp1-40S ribosome complex (PDB ID: 6ZLW). C-terminal helices of nsp1 are colored orange. Nsp1 N-terminal domain is considered to bind at the blue shaded region. (C) The distribution of the distance between the center-of-mass of N-terminal domain and that of C-terminal helices in our simulation. A blue vertical line indicates the distance estimated from the cryo-EM structure. . . . .                                              | 24 |
| 4 | Residue-wise all-against-all contact probability in the canonical ensemble. Color at each grid point indicates the statistical weight of the contact between the corresponding pair of residues (color scale shown at the right of the panel). The point filled by white indicates no detectable probability for contacts. Line plots at the top and right of the contact map depict the contact probability for each residue regardless of its counterpart. . . . .                                                                                                                   | 25 |
| 5 | Graphical representation of hydrogen bond interactions between SL1 and nsp1. Bases of U17 to C20 (colored blue) are recognized by the hydrogen bonds. . . . .                                                                                                                                                                                                                                                                                                                                                                                                                          | 26 |
| 6 | (A) Surface electrostatic potential of the nsp1 and (B) an annotated surface structure of nsp1 recognition sites for SL1. In (A), units are in $k_B T/e$ , where $k_B$ is the Boltzmann factor, $T = 300$ K is the temperature of the system, and $e$ is the unit charge of a proton. Color coding in (B) corresponds to the region defined in Fig. 1 D. . . . .                                                                                                                                                                                                                       | 27 |
| 7 | Interactions between nsp1 and SL1 observed in cluster 1. (A) Pairwise contact probability in cluster 1. See the legend of Fig. 4. (B) A representative snapshot of cluster 1. The interface regions (i) through (v) are shown in green, cyan, magenta, red, and blue ribbons. The 16–26th bases of SL1 are shown in orange. . . . .                                                                                                                                                                                                                                                    | 28 |
| 8 | Schematic model of nsp1 translation shutoff evasion from our simulation. (A) Without SL1, C-terminal helices of nsp1 shut the tunnel for mRNA. (B) With SL1, the N-terminal domain and IDR of nsp1 binds to SL1, and the C-terminal helices dissociate from the ribosome, opening the tunnel for mRNA. . . . .                                                                                                                                                                                                                                                                         | 29 |

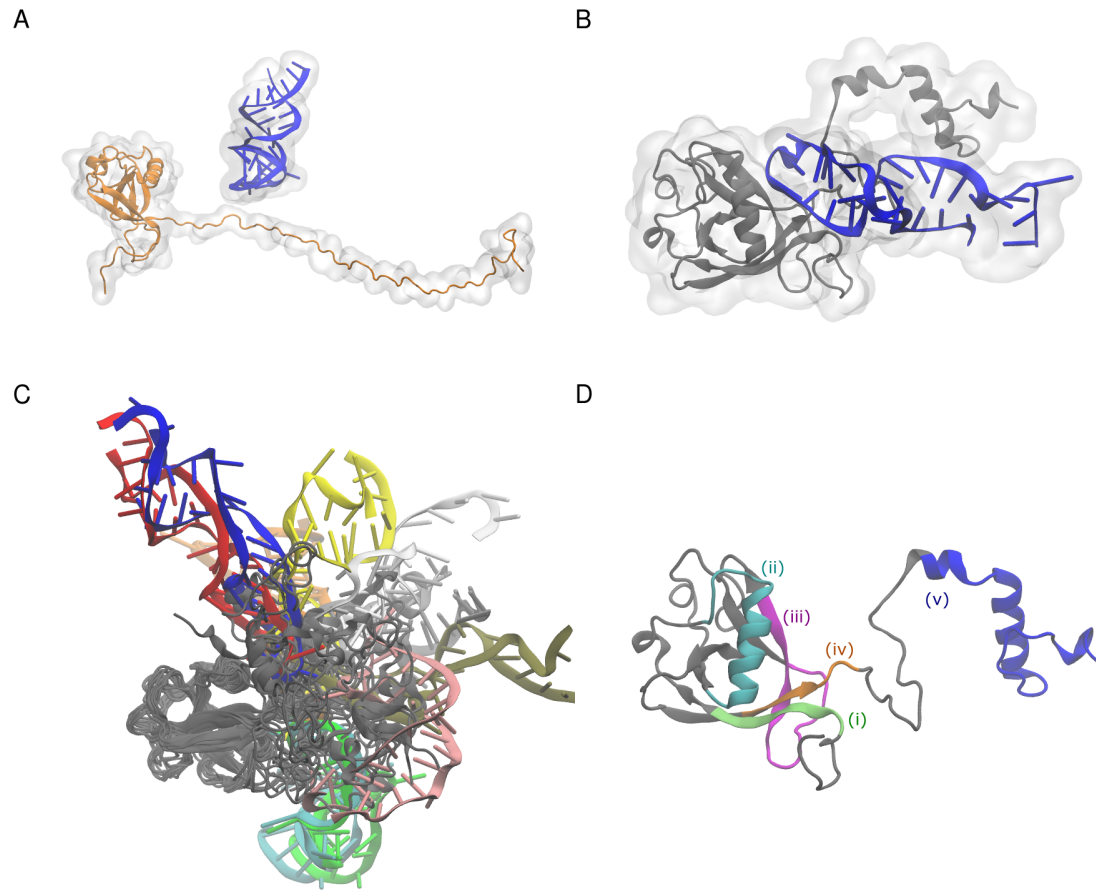

Figure 1: (A) Initial structure before starting the simulation. (B) Structure of the complex at 50 ns in 0th replica (i.e., the simulation with the unscaled potential). (C) Structures from superimposed 20 representative snapshots of the nsp1-SL1 complex. Snapshots were obtained from a weighted random sampling. Different snapshots from SL1 were colored differently. (D) Nsp1 segmentation used in the analysis: (i) residues 1 to 18, green; (ii) residues 31 to 50, cyan; (iii) residues 74 to 90, magenta; (iv) residues 121 to 146, orange; (v) residues 147 to 180, blue.

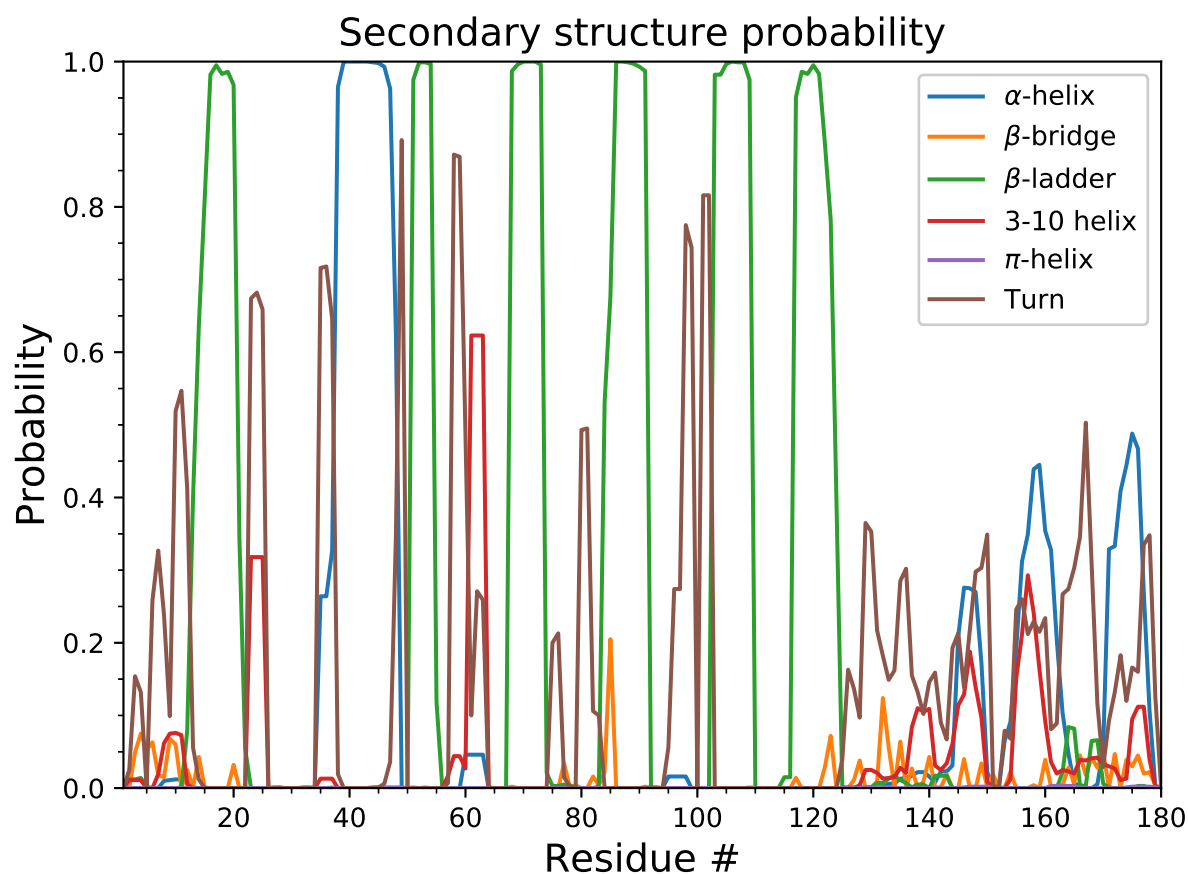

Figure 2: Secondary structure distribution of nsp1. Probabilities were calculated using the reweighting of last 25 ns simulation trajectories.



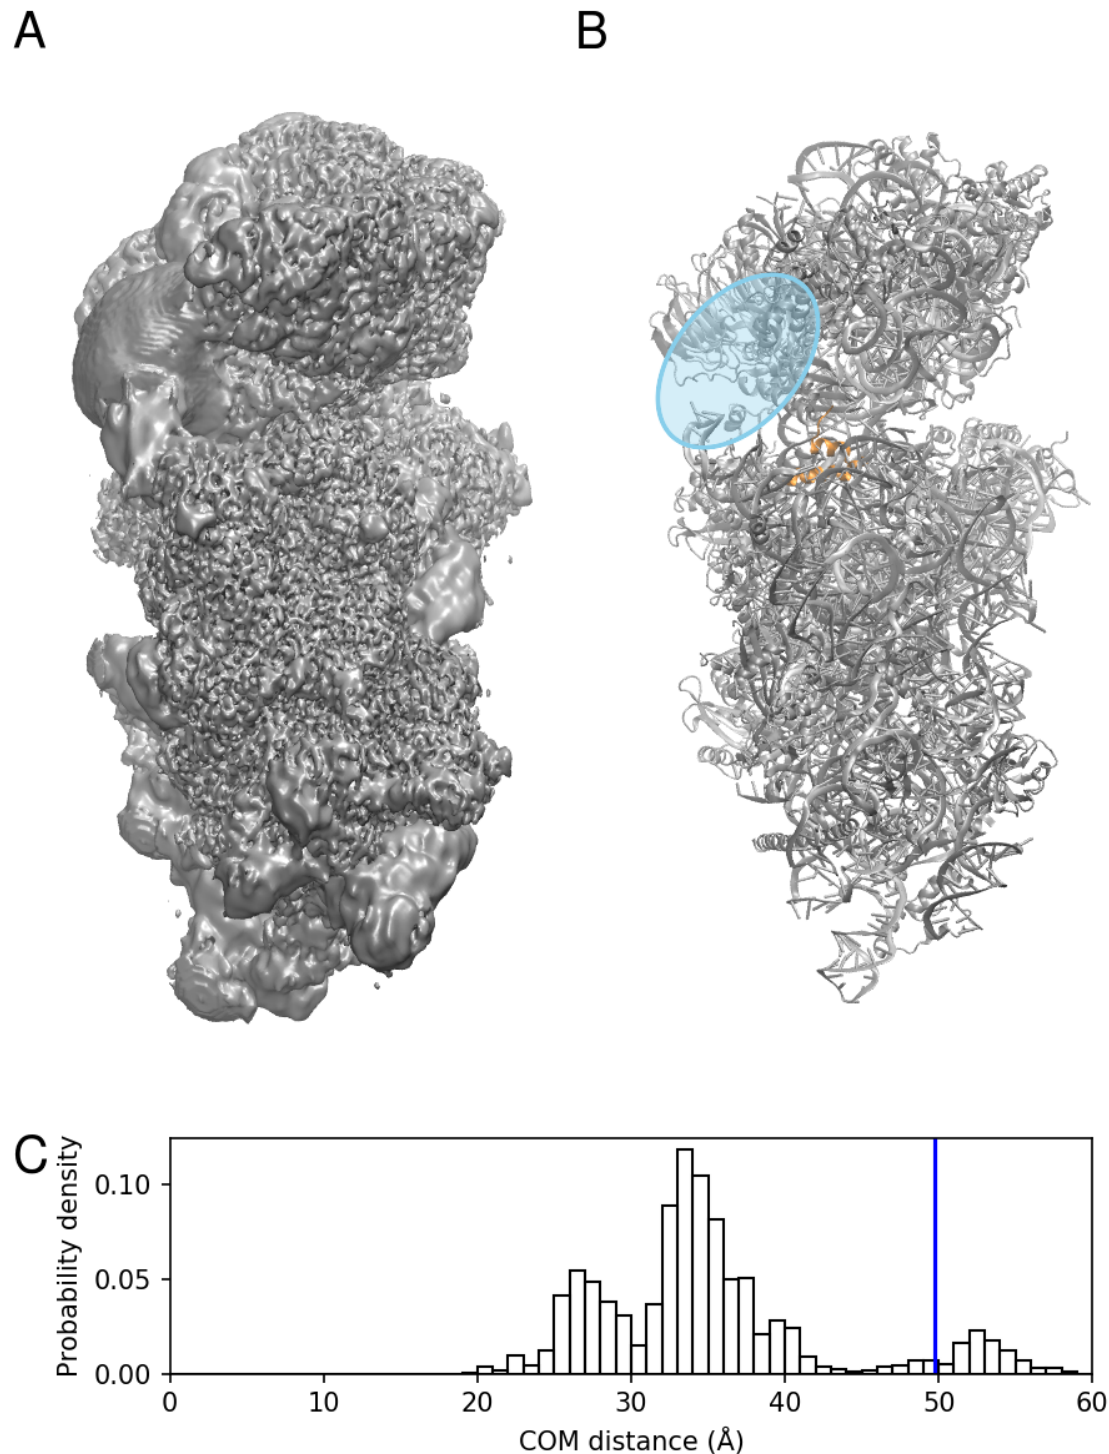

Figure 3: (A) The cryo-EM structure of nsp1-40S ribosome complex (Electron Microscopy Data Bank ID: EMD-11276). (B) The cartoon representation of nsp1-40S ribosome complex (PDB ID: 6ZLW). C-terminal helices of nsp1 are colored orange. Nsp1 N-terminal domain is considered to bind at the blue shaded region. (C) The distribution of the distance between the center-of-mass of N-terminal domain and that of C-terminal helices in our simulation. A blue vertical line indicates the distance estimated from the cryo-EM structure.



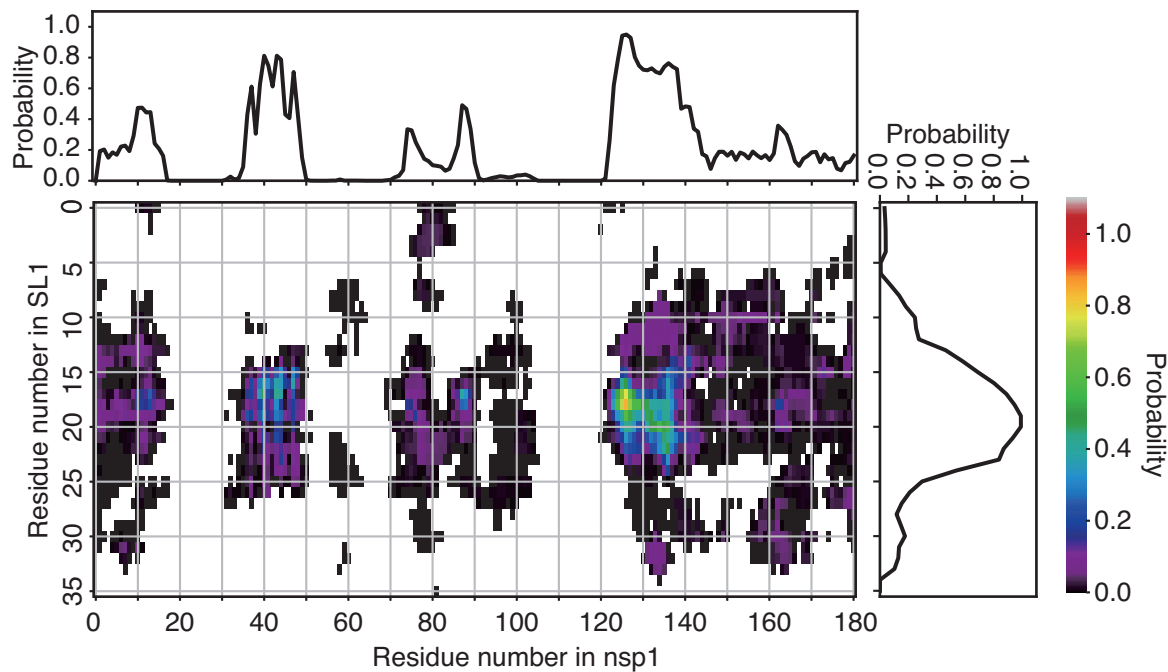

Figure 4: Residue-wise all-against-all contact probability in the canonical ensemble. Color at each grid point indicates the statistical weight of the contact between the corresponding pair of residues (color scale shown at the right of the panel). The point filled by white indicates no detectable probability for contacts. Line plots at the top and right of the contact map depict the contact probability for each residue regardless of its counterpart.

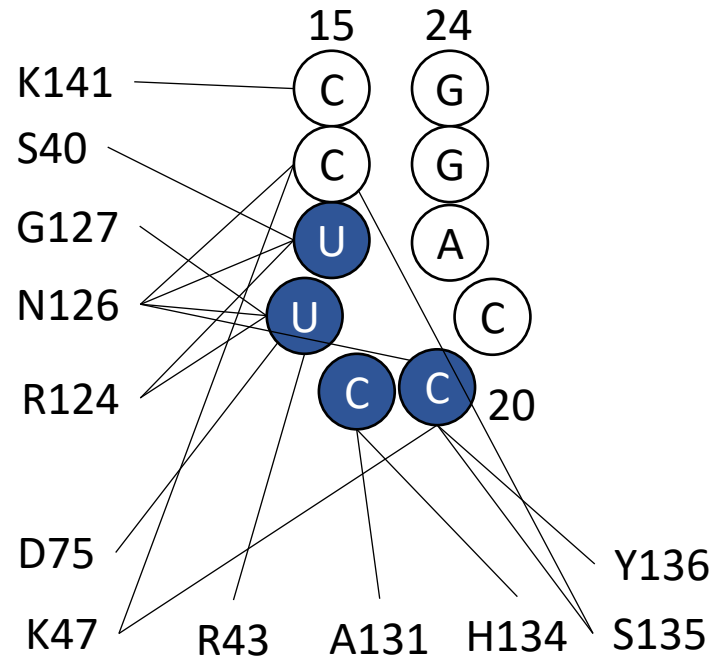

Figure 5: Graphical representation of hydrogen bond interactions between SL1 and nsp1. Bases of U17 to C20 (colored blue) are recognized by the hydrogen bonds.

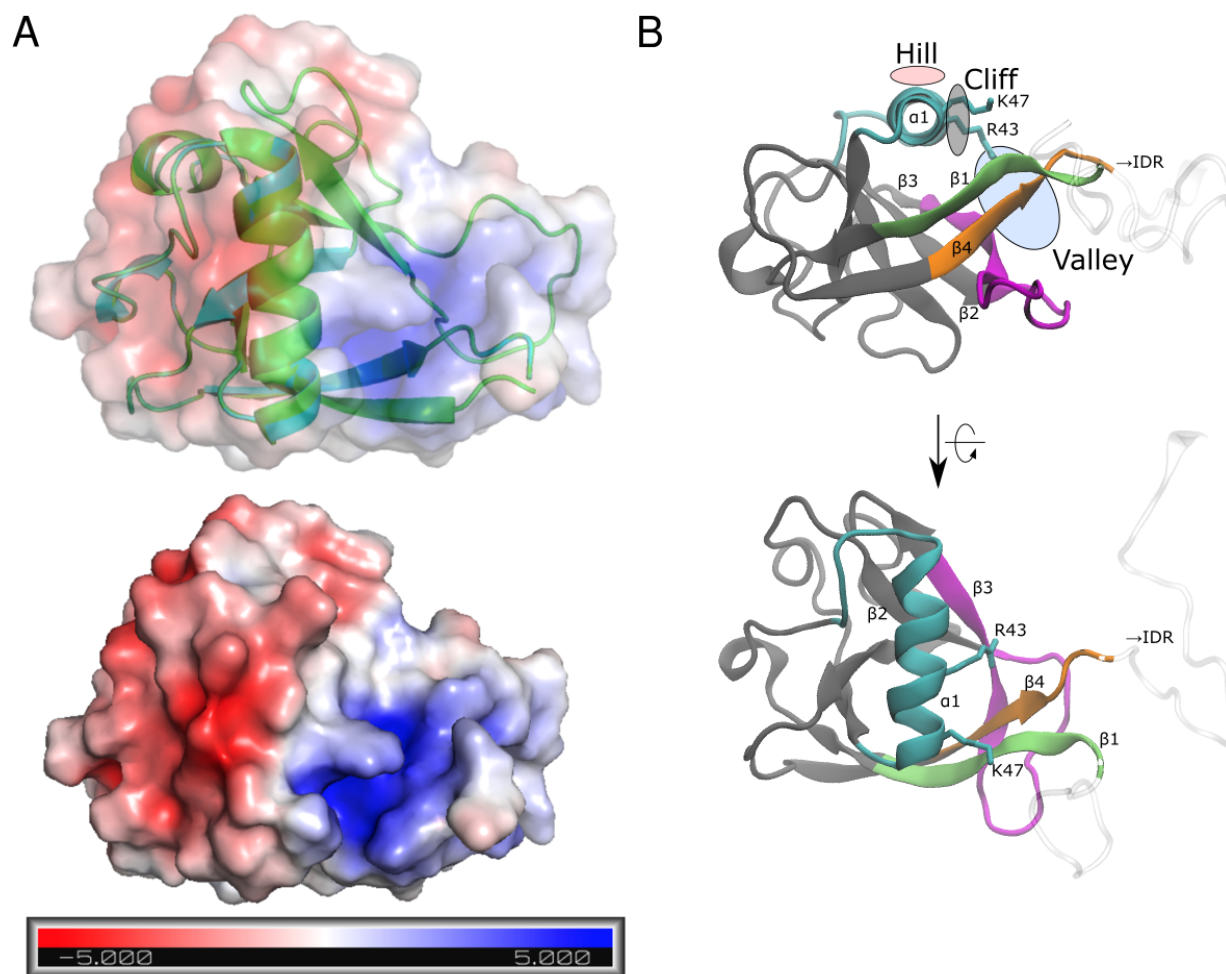

Figure 6: (A) Surface electrostatic potential of the nsp1 and (B) an annotated surface structure of nsp1 recognition sites for SL1. In (A), units are in  $k_B T/e$ , where  $k_B$  is the Boltzmann factor,  $T = 300$  K is the temperature of the system, and  $e$  is the unit charge of a proton. Color coding in (B) corresponds to the region defined in Fig. 1 D.

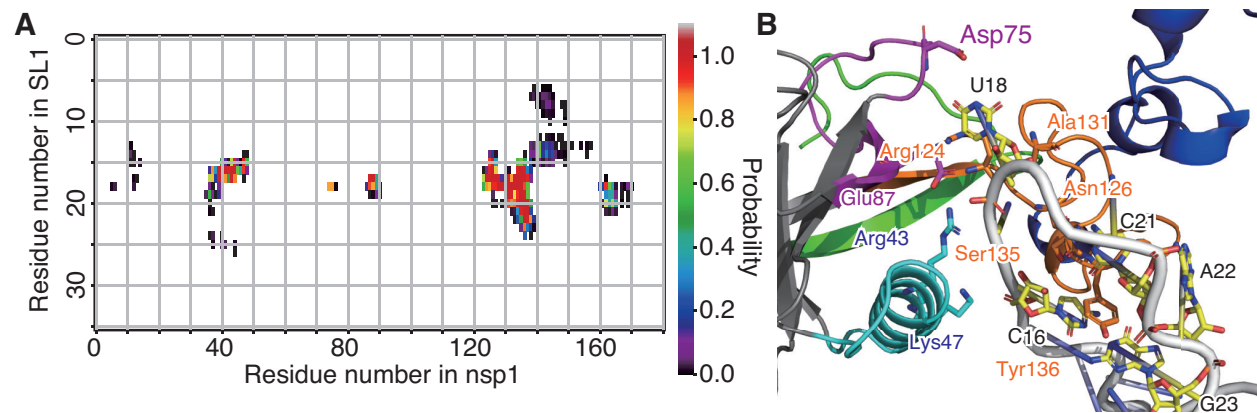

Figure 7: Interactions between nsp1 and SL1 observed in cluster 1. (A) Pairwise contact probability in cluster 1. See the legend of Fig. 4. (B) A representative snapshot of cluster 1. The interface regions (i) through (v) are shown in green, cyan, magenta, red, and blue ribbons. The 16–26th bases of SL1 are shown in orange.

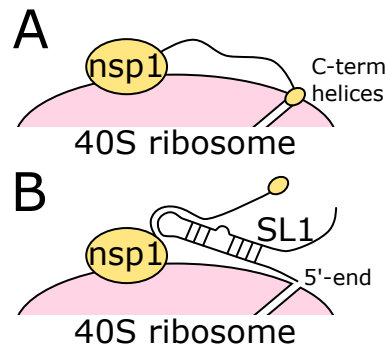

Figure 8: Schematic model of nsp1 translation shutoff evasion from our simulation. (A) Without SL1, C-terminal helices of nsp1 shut the tunnel for mRNA. (B) With SL1, the N-terminal domain and IDR of nsp1 binds to SL1, and the C-terminal helices dissociate from the ribosome, opening the tunnel for mRNA.

# List of Tables

|   |                                                       |    |
|---|-------------------------------------------------------|----|
| 1 | Hydrogen bonds observed between SL1 and nsp1. . . . . | 31 |
|---|-------------------------------------------------------|----|

Table 1: Hydrogen bonds observed between SL1 and nsp1.

| Nsp1 residue | Main/side | SL1 base | BB/base  | %    |
|--------------|-----------|----------|----------|------|
| Arg124       | Side      | U18      | Backbone | 26.0 |
| Lys47        | Side      | C16      | Backbone | 23.0 |
| Arg43        | Side      | U17      | Backbone | 19.6 |
| Asn126       | Side      | U17      | Backbone | 18.7 |
| Gly127       | Main      | U18      | Backbone | 18.2 |
| Asn126       | Side      | C20      | Base     | 17.4 |
| Ser135       | Main      | C20      | Base     | 14.8 |
| Arg124       | Main      | U17      | Base     | 14.4 |
| Asn126       | Side      | C20      | Backbone | 13.4 |
| Ser40        | Side      | U17      | Backbone | 13.1 |
| Asn126       | Side      | C16      | Backbone | 13.0 |
| Asp75        | Main      | U18      | Base     | 12.7 |
| Asn126       | Side      | U18      | Backbone | 12.3 |
| Ala131       | Main      | C19      | Base     | 12.2 |
| Ser135       | Side      | C16      | Sugar    | 12.2 |
| Lys47        | Side      | C20      | Backbone | 12.0 |
| Tyr136       | Main      | C20      | Base     | 11.9 |
| Ser135       | Side      | C20      | Base     | 11.6 |
| His134       | Main      | C19      | Base     | 10.8 |
| Asp75        | Side      | U18      | Base     | 10.4 |
